# Supplementary material for: Development and application of a 6.5 million feature Affymetrix Genechip® for massively parallel discovery of single position polymorphisms in lettuce (Lactuca spp.)
Source: PubMed Central journal article supplement (PMC3490809; doi:10.1186/1471-2164-13-185), 2012-05-14
Supplement: 1471-2164-13-185-S2.pdf [file 1471-2164-13-185-S2.pdf]

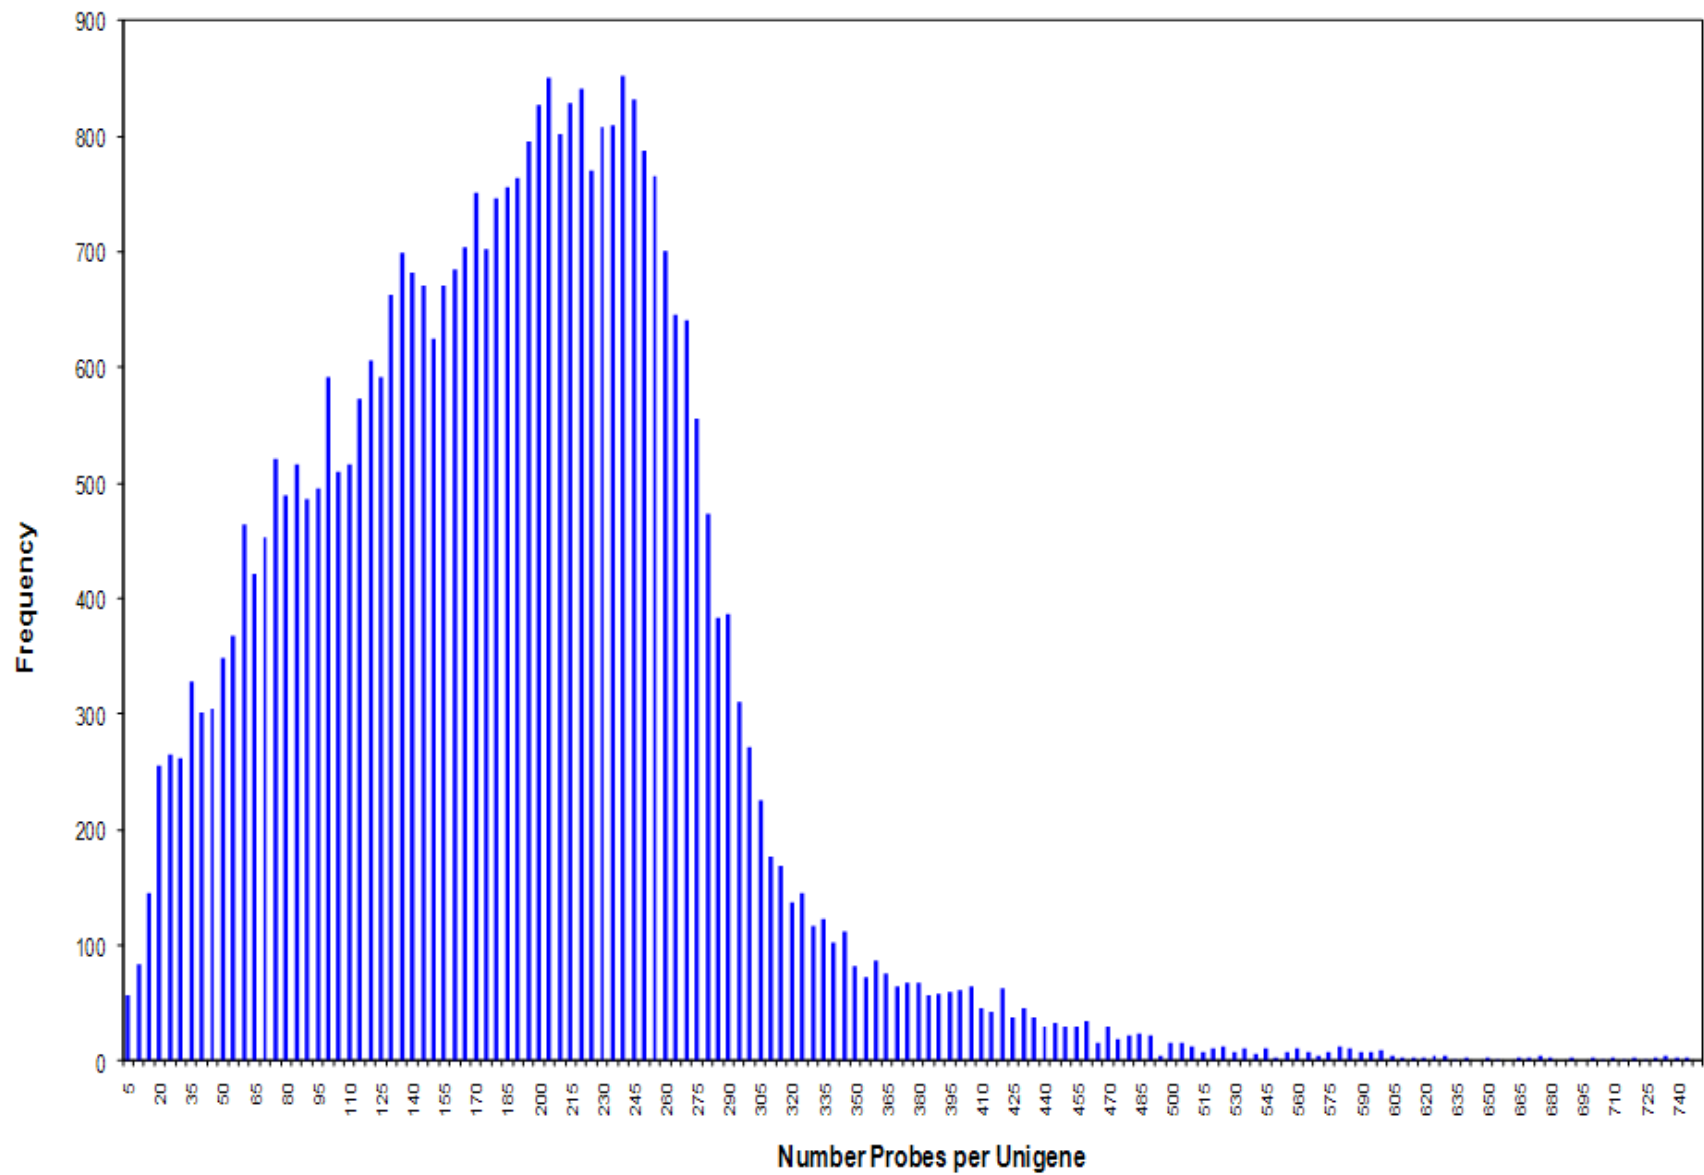

**Figure S2** A histogram showing the number of probes per unigene.
