# Supplementary material for: Development and application of a 6.5 million feature Affymetrix Genechip® for massively parallel discovery of single position polymorphisms in lettuce (Lactuca spp.)
Source: PubMed Central journal article supplement (PMC3490809; doi:10.1186/1471-2164-13-185), 2012-05-14
Supplement: 1471-2164-13-185-S7.pdf [file 1471-2164-13-185-S7.pdf]

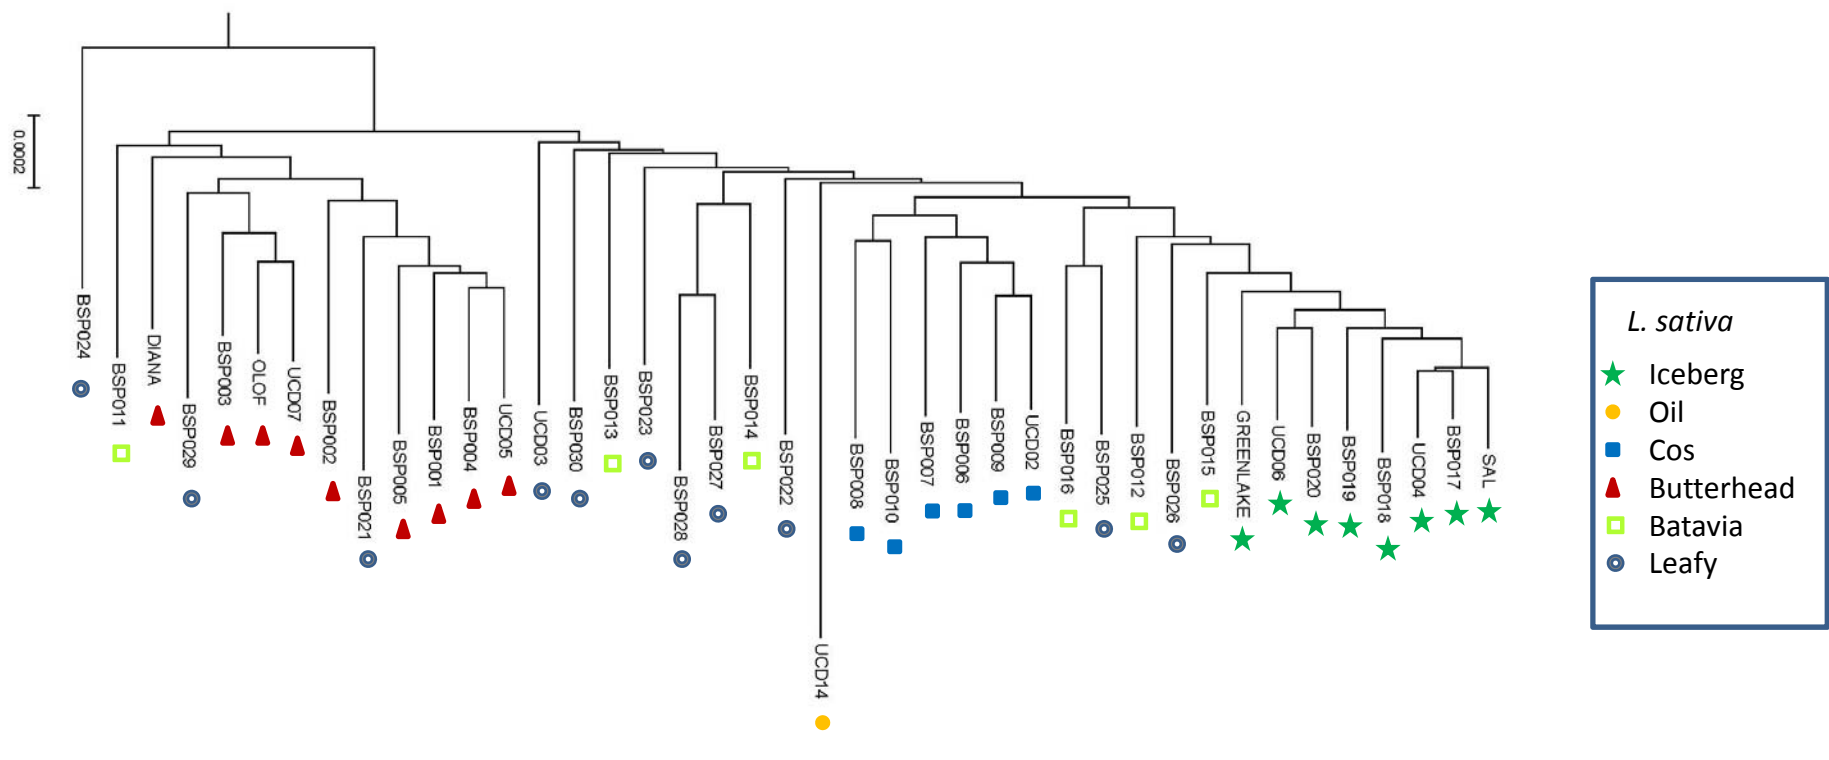

**Figure S7** Enlarged view of *L. sativa* clade from Tree 2 phylogram. Branch lengths represent relative genetic distance.
